# Supplementary material
Source: PubMed Central journal article supplement (PMC3942871)
Supplement: NIHMS530144-supplement-01.pdf [file NIHMS530144-supplement-01.pdf]

1  
2  
3  
4 Supplement 1

5  
6 Sample Search Strategy (PubMed)

7  
8 Mental Health

9 "Mental Health"[majr] OR "mental health"[tiab] OR "mental illness"[tiab] OR "Anxiety Disorders"[Mesh] OR  
10 "Anxiety, Separation"[Mesh] OR "Attention Deficit and Disruptive Behavior Disorders"[Mesh] OR "Depressive  
11 Disorder/classification"[Mesh] OR "Depressive Disorder/diagnosis"[Mesh] OR "Substance-Related  
12 Disorders/classification"[Mesh] OR "Substance-Related Disorders/diagnosis"[Mesh] OR "Self-Injurious  
13 Behavior/classification"[Mesh] OR "Self-Injurious Behavior/diagnosis"[Mesh] OR "anxiety"[tiab] OR  
14 "depression"[tiab] OR "attention deficit"[tiab])

15  
16  
17 Youth

18 "Child"[Mesh] OR "Adolescent"[Mesh] OR "Minors"[Mesh] OR "adolescen\*"[tiab] OR "teen\*"[tiab] OR  
19 "youth"[tiab] OR "children"[tiab]

20  
21 Primary care

22 Primary Health Care"[Mesh] OR "Adolescent Medicine"[Mesh] OR "General Practice"[Mesh] OR "Pediatrics"[Mesh]  
23 OR "General Practitioners"[Mesh] OR "Physicians, Family"[Mesh] OR "Physicians, Primary Care"[Mesh] OR "primary  
24 care"[tiab] OR "pediatric\*"[tiab] OR "paediatric\*"[tiab]

25  
26 Screening

27 "Screen\*"[tiab] OR "mass screening"[MeSH:noexp] OR "questionnaires"[Majr] OR "Risk Assessment"[Mesh:noexp]

28  
29 Key domains are listed above in bold. Domains were joined using the Boolean operator "AND." Due to the high  
30 number of search hits, we added the following exclusion terms to the PubMed search, using the Boolean operator  
31 "NOT"

32  
33 EXCLUSIONS

34 NOT ("developmental disabilities"[MeSH] OR "developmental disabilities"[tiab] OR "autism"[tiab] OR  
35 "asthma"[MeSH] OR "asthma"[tiab] OR "obesity"[MeSH Terms] OR "obesity"[tiab] OR "chronic pain"[tiab] OR  
36 "cancer"[tiab] OR "cardiac"[tiab] OR "diabetes"[tiab] OR "epilepsy"[tiab] OR "infection"[tiab] OR "oral"[tiab] OR  
37 "dental"[tiab] OR "allergy"[tiab] OR "hypertension"[tiab] OR "inflammatory bowel disease"[tiab] OR  
38 "congenital"[tiab] OR "arthritis"[tiab] OR "musculoskeletal"[tiab])

Table S1. Setting, Instruments, Scoring, Follow-Up, and Clinical Impact

| Lead author, year, and citation <sup>a</sup>                                       | Setting and population                                                                       | Instrument                                                        | Who scores and training in scoring                                                         | Follow-up to screen and training or assistance with follow-up                                                                                                                  | Impact on visit                                                                                                                                                  | Impact on referrals and utilization                          |
|------------------------------------------------------------------------------------|----------------------------------------------------------------------------------------------|-------------------------------------------------------------------|--------------------------------------------------------------------------------------------|--------------------------------------------------------------------------------------------------------------------------------------------------------------------------------|------------------------------------------------------------------------------------------------------------------------------------------------------------------|--------------------------------------------------------------|
| Applegate 2003 <sup>39</sup>                                                       | Residents (4); 52 patients age 6–16 coming for WCC                                           | PSC with or without parent handout                                | Residents taught “how to use and score.” Taught about importance of intervention.          | Resident decides how to use results and handouts                                                                                                                               | Increased behavioral discussions but not related to PSC score; authors speculated residents did not use screener to identify children needing more intervention. | No increase in behavioral interventions from baseline        |
| Asarnow 2005 <sup>50</sup> ; Asarnow 2009 <sup>76</sup> ; Wells 2012 <sup>77</sup> | 4,002 youth 13–21 screened, 418 enrolled and then randomized, range of primary care settings | Set of items for depression/dysthymia from CIDI and CES-D         | Study staff (enrolled patients randomized to usual care or QI intervention for depression) | In QI condition care manager of PhD level clinician supported PCP with evaluation, patient education, treatment, referral; usual care PCPs trained on evaluation and treatment | No difference in satisfaction with mental health care between QI and usual care group                                                                            | QI group patients had fewer depression symptoms at follow-up |
| Ballard 2012 <sup>63</sup> ; Horowitz 2010 <sup>66</sup>                           | Convenience sample of 156 ED ages 10–21                                                      | 15 or 30 item version of Suicidal Ideation Questionnaire          | Not stated                                                                                 | On-site ED psychiatric staff evaluate positive results while patient waits for ED provider                                                                                     | Those requiring psychiatric evaluation did not have longer visits                                                                                                | Not stated                                                   |
| Berger-Jenkins 2012 <sup>40</sup>                                                  | 229 children 5–12 in primary care                                                            | Initial screening question about concerns; if positive get PSC-17 | Nurse scores and puts on chart                                                             | Providers introduced to PSC and rationale for scoring; encouraged to use own judgment about results; on-site MH consultant 1 day/week                                          | Increase in chart notes re: MH concerns but no change in proportion with MH diagnosis                                                                            | Referrals decreased                                          |
| Briggs 2012 <sup>58</sup>                                                          | 3,169 children 6–36 months in primary care                                                   | ASQ-SE given a 6-month intervals                                  | Psychologist scores                                                                        | Positive screens given to co-located psychologist, who consults with PCP about treatment                                                                                       | Not stated                                                                                                                                                       | MH intervention reduced subsequent scores                    |
| <sup>b</sup> Chisolm 2008 <sup>52</sup>                                            | 1,021 youth 11–20 in primary care                                                            | Health eTouch behavioral risk screen (computerized)               | Scored electronically, positive results and individual items given to provider             | No discussion of provider training or assistance                                                                                                                               | Not stated                                                                                                                                                       | Not applicable                                               |

1  
2  
3  
4  
5  
6  
7  
8  
9  
10  
11  
12  
13  
14  
15  
16  
17  
18  
19  
20  
21  
22  
23  
24  
25  
26  
27  
28  
29  
30  
31  
32  
33  
34  
35  
36  
37  
38  
39  
40  
41  
42  
43  
44  
45  
46  
47  
48  
49

| Lead author, year, and citation <sup>a</sup> | Setting and population           | Instrument                                                                        | Who scores and training in scoring                                                                                                                                                        | Follow-up to screen and training or assistance with follow-up                                                                                                                  | Impact on visit                                                                                                                                                                   | Impact on referrals and utilization                                                                                                                                        |
|----------------------------------------------|----------------------------------|-----------------------------------------------------------------------------------|-------------------------------------------------------------------------------------------------------------------------------------------------------------------------------------------|--------------------------------------------------------------------------------------------------------------------------------------------------------------------------------|-----------------------------------------------------------------------------------------------------------------------------------------------------------------------------------|----------------------------------------------------------------------------------------------------------------------------------------------------------------------------|
| <sup>b</sup> Chisolm 2009 <sup>10</sup>      | 996 youth 11–20 in primary care  | Health eTouch behavioral risk screen (computerized)                               | Scored electronically, positive results and individual items given to provider (randomized to get immediate versus delayed)                                                               | No discussion of provider training or assistance                                                                                                                               | Not stated                                                                                                                                                                        | Increased use of medical and MH services over next 6 months; positive screen increased depression care (vs. negative screen) but substance care unrelated to screen result |
| <sup>b</sup> Stevens 2008 <sup>48</sup>      | 878 youth 11–20 in primary care  | Health eTouch behavioral risk screen (computerized)                               | Scored electronically, positive results and individual items given to provider (randomized to get immediate versus delayed). Increased cut-off during study when providers “overwhelmed.” | No discussion of provider training                                                                                                                                             | Increased provider recognition of behavioral and substance concerns in immediate vs. delayed results, but even with immediate feedback 45% of youth with concerns missed by PCP’s | Not applicable                                                                                                                                                             |
| <sup>b</sup> Gardner 2010 <sup>53</sup>      | 1547 youth 11–20 in primary care | Health eTouch behavioral risk screen; this paper focuses on suicide screen, PHQ-A | Scored electronically, positive results and individual items given to provider (usually before visit) and suicide prevention team.                                                        | PCP not trained; had option of discussing results with family or referring to on-site social worker and suicide prevention team; assistance with scheduling follow-up MH visit | Social workers spoke to 98% of those with SI; PCP role not discussed                                                                                                              | 65% of those referred for MH follow-up received it in next 6 months                                                                                                        |
| Diamond 2010 <sup>72</sup>                   | 415 youth 12–21 in primary care  | Behavioral Health Screen                                                          | Scored electronically, PCP receives printout with scaled scores by domain                                                                                                                 | Those with behavioral need “referred appropriately;” no discussion of training (though instrument designed to “focus clinical conversations about risk.”                       | Providers thought BHS useful for facilitating visit, planning conduct of visit, guiding follow-up questions                                                                       | Not applicable                                                                                                                                                             |

1  
2  
3  
4  
5  
6  
7  
8  
9  
10  
11  
12  
13  
14  
15  
16  
17  
18  
19  
20  
21  
22  
23  
24  
25  
26  
27  
28  
29  
30  
31  
32  
33  
34  
35  
36  
37  
38  
39  
40  
41  
42  
43  
44  
45  
46  
47  
48  
49

| Lead author, year, and citation <sup>a</sup> | Setting and population                                                                                                           | Instrument                                                                                                           | Who scores and training in scoring                                                                   | Follow-up to screen and training or assistance with follow-up                                                                                                                                                    | Impact on visit                                                                                                                                                          | Impact on referrals and utilization                                                                                                                    |
|----------------------------------------------|----------------------------------------------------------------------------------------------------------------------------------|----------------------------------------------------------------------------------------------------------------------|------------------------------------------------------------------------------------------------------|------------------------------------------------------------------------------------------------------------------------------------------------------------------------------------------------------------------|--------------------------------------------------------------------------------------------------------------------------------------------------------------------------|--------------------------------------------------------------------------------------------------------------------------------------------------------|
| Fein 2010 <sup>59</sup>                      | 857 youth 14–18 in ED                                                                                                            | Behavioral Health Screen-ED                                                                                          | Scored electronically, ED provider receives printout with scaled scores by domain                    | Clinical staff followed “routine care” which could include SW or psychiatric consult; training not discussed                                                                                                     | Increased identification of patients with psychiatric illness                                                                                                            | Increased ED-based SW and psychiatric assessments                                                                                                      |
| Pailler 2009 <sup>45, 60</sup>               | Pilot: Youth 14–18 in ED, number not stated<br><br>Interviews pre-pilot: 60 non-acute ED patients 12–18 and parents              | Behavioral Health Screen-ED                                                                                          | Scored electronically, ED provider receives printout with scaled scores                              | Nurses and ED technicians received on-site training; other ED staff made aware. Providers instructed to “follow their routine care” of positive screens; consultation available. Database of referral resources. | Not discussed.                                                                                                                                                           | Mentions comparison of patient outcomes and referrals before and after implementation but does not provide data.                                       |
| Gall 2000 <sup>54</sup>                      | 383 youth 13–18 in school-based health center                                                                                    | PSC-Y plus additional questions (including, “Do you have emotional or behavioral problems for which you want help?”) | Score recorded in medical record; who scores not stated.                                             | No mention of training. Students with positive screen who asked for referral received one. Agreement with MCO to provide referrals.                                                                              | Not discussed.                                                                                                                                                           | Positive score strongly associated with referral (81% of positives versus 8% of negatives); referral related to later decreased absences and tardiness |
| Garrison 1992 <sup>65</sup>                  | 1,378 well child visits to urban primary care clinic and 3 private practices; 327 cases where parent raised psychosocial concern | 1-page bilingual survey with demographics, parent concerns, indication of desire to talk to PCP                      | Placed in chart after parent completes it; evidently even if parent did not wish to discuss with PCP | No mention of training; in urban setting more often asked patients to return for further discussion; in private practice gave reassurance and guidance.                                                          | Providers did not address concern in 35% of visits where parent had concern and wanted to talk about it. Parents with fewer concerns more likely to have them discussed. | Medicaid families more likely to be referred.                                                                                                          |

1  
2  
3  
4  
5  
6  
7  
8  
9  
10  
11  
12  
13  
14  
15  
16  
17  
18  
19  
20  
21  
22  
23  
24  
25  
26  
27  
28  
29  
30  
31  
32  
33  
34  
35  
36  
37  
38  
39  
40  
41  
42  
43  
44  
45  
46  
47  
48  
49

| Lead author, year, and citation <sup>a</sup> | Setting and population                                                                                   | Instrument                                                   | Who scores and training in scoring                                                                            | Follow-up to screen and training or assistance with follow-up                                                                                                                                                                                         | Impact on visit                                | Impact on referrals and utilization                                                                                                  |
|----------------------------------------------|----------------------------------------------------------------------------------------------------------|--------------------------------------------------------------|---------------------------------------------------------------------------------------------------------------|-------------------------------------------------------------------------------------------------------------------------------------------------------------------------------------------------------------------------------------------------------|------------------------------------------------|--------------------------------------------------------------------------------------------------------------------------------------|
| Gruttadero 2011 <sup>38</sup>                | 554 family respondents of web-based survey of caregivers of children and youth with mental illness       | Survey of experiences with primary care providers            | Not applicable                                                                                                | Not applicable                                                                                                                                                                                                                                        | Not applicable                                 | Not applicable                                                                                                                       |
| Hacker 2006 <sup>11</sup>                    | 1,668 youth 4yrs/11mos to 19 years at well visits in primary care                                        | PSC or PSC-Y plus additional questions about parent concerns | Provider scores once visit has begun                                                                          | Providers instructed to discuss results with family; make handoff to co-located SW in person. Children who score positive and not already in care, and those negative but parent has concern, are referred, but provider can refer anyone if desired. | Not described                                  | Number of MH referrals doubled from year prior to screening; of those referred, 41% had positive PSC                                 |
| Hacker 2009 <sup>12</sup>                    | 1,033 youth 4yrs/11mos to 19 years at well visits in primary care who had more than one screen over time | PSC or PSC-Y plus additional questions about parent concerns | Provider scores once visit has begun                                                                          | Same as Hacker 2006                                                                                                                                                                                                                                   | Not described                                  | Referral of youth at index visit associated with drop in PSC score at follow-up but not related to whether referral appointment kept |
| Hartung 2010 <sup>55</sup>                   | 328 children 3–12 in primary care                                                                        | Primary Care MH Screener                                     | Instrument not scored—PCP to review items<br><br>Need impairment to justify referral; no strict cut-off score | PCPs trained:<br>-items matching particular symptom clusters<br>-look for often or very often items<br>-criteria for asking follow-up questions<br>-general probes asking for examples and related functional problems<br>-referral list              | Not described (paper focuses on psychometrics) | Not described (paper focuses on psychometrics)                                                                                       |

1  
2  
3  
4  
5  
6  
7  
8  
9  
10  
11  
12  
13  
14  
15  
16  
17  
18  
19  
20  
21  
22  
23  
24  
25  
26  
27  
28  
29  
30  
31  
32  
33  
34  
35  
36  
37  
38  
39  
40  
41  
42  
43  
44  
45  
46  
47  
48  
49

| Lead author, year, and citation <sup>a</sup>                | Setting and population                                                       | Instrument                                                                         | Who scores and training in scoring                                                                                                     | Follow-up to screen and training or assistance with follow-up                                                                                                                                                                            | Impact on visit                                                                                                                                                                                                                                             | Impact on referrals and utilization                                                                                                              |
|-------------------------------------------------------------|------------------------------------------------------------------------------|------------------------------------------------------------------------------------|----------------------------------------------------------------------------------------------------------------------------------------|------------------------------------------------------------------------------------------------------------------------------------------------------------------------------------------------------------------------------------------|-------------------------------------------------------------------------------------------------------------------------------------------------------------------------------------------------------------------------------------------------------------|--------------------------------------------------------------------------------------------------------------------------------------------------|
| Hayutin 2009 <sup>51</sup>                                  | 174 children ages 4–16 in primary care and pediatric GI clinic               | PSC                                                                                | Parents randomized (according to their provider) to no screen, to score screen themselves, or to have nurse or medical assistant score | Providers told that purpose of study was to evaluate waiting-room intervention to increase communication about emotional and behavioral problems; providers received 5-minute training and written instructions on interpretation of PSC | Screening increased discussion of psychosocial issues among those with higher scores, regardless of who scores; staff scoring associated with more physician initiation of discussion; parent scoring associated with higher ratings of “enough” discussion | No impact of screening on referrals (rate very low)                                                                                              |
| Horwitz 2008 <sup>57</sup>                                  | 376 families of children up to age 8 scheduled for well care in primary care | “CHADIS” system of multiple (23) screeners on-line plus asking for ranked concerns | Computer scored                                                                                                                        | 30-minute session on epidemiology and diagnosis. System includes on-line materials for providers and families.                                                                                                                           | Too time consuming for provider, better for assistant; not always aware that screening completed; providers did not find on-line material useful.                                                                                                           | Not applicable                                                                                                                                   |
| Husky 2011 <sup>56</sup>                                    | 483 youth 13–17 coming for well care in primary care                         | DPS-8                                                                              | Computer-generated summary of disorder and total scores                                                                                | No information about training or preparation of providers, but provider review “privately with adolescent” is recognized as second stage of screen.                                                                                      | Not described.                                                                                                                                                                                                                                              | Screening regardless of outcome resulted in more MH and pediatric follow-up, but positive screen moreso; doubled proportion thought to need care |
| Jee 2011 <sup>41</sup>                                      | 195 youth 11–17 in foster care                                               | SDQ                                                                                | Not formally scored until after visit                                                                                                  | Providers review SDQ during visit; training not discussed; SW available to make referrals                                                                                                                                                | Doubled detection rate of social-emotional problems from 27 to 54%                                                                                                                                                                                          | Not known                                                                                                                                        |
| Jellinek 1999 <sup>78</sup><br>Wasserman 1999 <sup>79</sup> | 21,065 youth ages 4–15 in primary care practice-based research networks      | PSC                                                                                | Not stated who scores                                                                                                                  | Training video for practices but details not provided                                                                                                                                                                                    | Not stated, providers did not have access to PSC results                                                                                                                                                                                                    | Not stated                                                                                                                                       |

1  
2  
3  
4  
5  
6  
7  
8  
9  
10  
11  
12  
13  
14  
15  
16  
17  
18  
19  
20  
21  
22  
23  
24  
25  
26  
27  
28  
29  
30  
31  
32  
33  
34  
35  
36  
37  
38  
39  
40  
41  
42  
43  
44  
45  
46  
47  
48  
49

| Lead author, year, and citation <sup>a</sup> | Setting and population                                                                     | Instrument                                                                                             | Who scores and training in scoring                                           | Follow-up to screen and training or assistance with follow-up                                                                                                                                  | Impact on visit                                                                                                                                                                                           | Impact on referrals and utilization                                                                                 |
|----------------------------------------------|--------------------------------------------------------------------------------------------|--------------------------------------------------------------------------------------------------------|------------------------------------------------------------------------------|------------------------------------------------------------------------------------------------------------------------------------------------------------------------------------------------|-----------------------------------------------------------------------------------------------------------------------------------------------------------------------------------------------------------|---------------------------------------------------------------------------------------------------------------------|
| Kelleher 1997 <sup>80</sup>                  | 10,250 youth ages 4–15 in primary care practice-based research networks                    | PSC                                                                                                    | Not stated who scores                                                        | Training video for practices but details not provided                                                                                                                                          | Not stated and providers did not have access to PSC, but in independent report providers agreed with positive PSC 54% of the time. Agreement more likely if provider identified the patient as their own. | Not stated                                                                                                          |
| John 2007 <sup>61</sup>                      | 124 youth 8–18 selected by nursing students in a variety of ambulatory pediatric settings  | Short Mood and Feeling Questionnaire and four additional questions on PDA system (PDA-DSS)             | Not stated if PDA scores instrument                                          | Discussion suggests need for additional training on how to share results with patients and develop therapeutic relationship; PDA-DSS does include some teaching and “counseling interventions” | Not stated                                                                                                                                                                                                | Not stated                                                                                                          |
| King 2009 <sup>67</sup>                      | 295 youth ages 13–17 at ED                                                                 | Multiple instruments for depression, SI, alcohol abuse as initial screen and 4 others for second stage | Screening administered and scored by research staff and informs ED physician | Paper focuses on validity and utility versus prior diagnosis                                                                                                                                   | Not applicable                                                                                                                                                                                            | 54% of those positive for SI had come for other reasons (MH and medical); 56 of those positive already in treatment |
| King 2012 <sup>68</sup>                      | 245 youth ages 13–17 at ED                                                                 | Multiple instruments for depression, SI, alcohol abuse                                                 | Screening administered and scored by research staff                          | Paper focuses on whether telling youth that a staff member will review the results influences answers                                                                                          | Not applicable                                                                                                                                                                                            | Not applicable                                                                                                      |
| Kuhlthau 2011 <sup>9</sup>                   | Claims data for Massachusetts Medicaid pre- and postmandatory MH screening in primary care | Not specified                                                                                          | Not specified                                                                | Not specified                                                                                                                                                                                  | Not specified                                                                                                                                                                                             | 25% increase in number of children with behavioral health evaluations                                               |

1  
2  
3  
4  
5  
6  
7  
8  
9  
10  
11  
12  
13  
14  
15  
16  
17  
18  
19  
20  
21  
22  
23  
24  
25  
26  
27  
28  
29  
30  
31  
32  
33  
34  
35  
36  
37  
38  
39  
40  
41  
42  
43  
44  
45  
46  
47  
48  
49

| Lead author, year, and citation <sup>a</sup> | Setting and population                                                      | Instrument                                                                            | Who scores and training in scoring               | Follow-up to screen and training or assistance with follow-up                                                                                                                                                                             | Impact on visit                                                                                         | Impact on referrals and utilization                                                                           |
|----------------------------------------------|-----------------------------------------------------------------------------|---------------------------------------------------------------------------------------|--------------------------------------------------|-------------------------------------------------------------------------------------------------------------------------------------------------------------------------------------------------------------------------------------------|---------------------------------------------------------------------------------------------------------|---------------------------------------------------------------------------------------------------------------|
| Metz 1976 <sup>62</sup>                      | 983 youth 4–16 in primary care                                              | “Multiphasic” visit addressing several aspects of psychosocial and developmental risk | All instruments administered by aides and scored | PCP provided with summary of results listing past diagnoses, test failures, parent concerns but since PCP visit not on same day not clear if there is additional contact; follow-up at PCP discretion; supplementary counseling available | PCPs said it was useful                                                                                 | 4% of screen patients were “new cases” (57% of those identified as at risk)                                   |
| Murphy 1996 <sup>42</sup>                    | 379 youth 6–16 at school-based and neighborhood primary health care centers | PSC with additional questions about function, mental health care, demographics        | Not specified                                    | Not specified but PCPs could refer youth regardless of score; additional question about function included on form but use not stated                                                                                                      | 37% of those positive not referred (reasons not known but 36% of not referred positives had prior care) | Referrals for mental health care increased 6-fold; 69% of referrals had positive screen                       |
| Pagano 1996 <sup>71</sup>                    | 117 children 4–5 at school-based and neighborhood primary care centers      | PSC with additional questions about function, mental health care, demographics        | Not specified                                    | Questions added to PSC about functioning to help clinicians assess need for referral                                                                                                                                                      | Not stated                                                                                              | Parents who felt child needed help or wanted services more likely to be positive (14%) versus others (1%)     |
| Navon 2001 <sup>34</sup>                     | 570 2–18 years in urban primary care centers                                | PSC                                                                                   | Scored by research assistant                     | PCP told to use results as “adjunct to their clinical judgment... indicator of need for further services.” Multidisciplinary team meeting at PC site discussed program issues and individual cases. Not clear if all providers attended.  | Not stated                                                                                              | Of sub-sample of positives reviewed by team (25), 5 found to be OK, 4/20 with need not previously identified. |



1  
2  
3  
4  
5  
6  
7  
8  
9  
10  
11  
12  
13  
14  
15  
16  
17  
18  
19  
20  
21  
22  
23  
24  
25  
26  
27  
28  
29  
30  
31  
32  
33  
34  
35  
36  
37  
38  
39  
40  
41  
42  
43  
44  
45  
46  
47  
48  
49

| Lead author, year, and citation <sup>a</sup> | Setting and population                              | Instrument                                                                    | Who scores and training in scoring                                                                                  | Follow-up to screen and training or assistance with follow-up                                                                                                                                            | Impact on visit                                                                                                                                                                                                            | Impact on referrals and utilization |
|----------------------------------------------|-----------------------------------------------------|-------------------------------------------------------------------------------|---------------------------------------------------------------------------------------------------------------------|----------------------------------------------------------------------------------------------------------------------------------------------------------------------------------------------------------|----------------------------------------------------------------------------------------------------------------------------------------------------------------------------------------------------------------------------|-------------------------------------|
| Olson 2005 <sup>43</sup>                     | 165 adolescents in 6 rural primary care practices   | 90-item Healthy Teen screener based on GAPS                                   | PCPs involved in screen and follow-up plan development over 4 'PDSA' cycles; in use scored by computer with summary | Two-hour training on motivational interviewing, goal setting, action plans, patient-centered counseling; authors concluded that more training would have been helpful as would have been handouts.       | PCPs found it hard to develop action plans except when teen had specific concern; thought it would be better to use action plans for those already engaged; allowed use of time for counseling rather than data gathering. | Not applicable                      |
| Olson 2009 <sup>44</sup>                     | 1,052 youth 11–19 in 5 rural primary care practices | 90-item Healthy Teen screener based on GAPS (younger and older teen versions) | Computer scores; PCP can see printed report or scan all answers electronically.                                     | PCPs involved in development had role in deciding about cut-offs; otherwise training not specified. Part of screener assesses teen readiness to change; these results highlighted for PCP                | PCPs found screen helped target most at risk and those interested in change; helped better use time in visit, though trouble if too many risks presented at once and forced to prioritize.                                 | Not applicable                      |
| Schubiner 1994 <sup>49</sup>                 | 152 youth/young adults 14–23 in primary care        | Safe Times Questionnaire                                                      | In intervention arm PCP reviews and scores screen                                                                   | Training on preventive health screening and general guidelines for interviewing and health education, use of mnemonic to remember risk categories, psychometrics of screener                             | Videotape assessment compared visits with and without screener: screener visits shorter by 4 minutes (less time in assessment) but no increase in information time.                                                        | Not applicable                      |
| Smith 1990 <sup>54</sup>                     | 205 youth 10–17; urban hospital primary care clinic | STAI, CDI                                                                     | Not stated who scores instrument                                                                                    | Providers had to assess patient and develop provision diagnosis before receiving screening results; use unexpectedly positive screen to explore psychosocial history. MH assessment available in clinic. | 15% of patients had elevated screens but were not identified as having MH problem by PCP                                                                                                                                   | Not applicable                      |

1  
2  
3  
4  
5  
6  
7  
8  
9  
10  
11  
12  
13  
14  
15  
16  
17  
18  
19  
20  
21  
22  
23  
24  
25  
26  
27  
28  
29  
30  
31  
32  
33  
34  
35  
36  
37  
38  
39  
40  
41  
42  
43  
44  
45  
46  
47  
48  
49

| Lead author, year, and citation <sup>a</sup> | Setting and population                                                                      | Instrument                                                                          | Who scores and training in scoring                                                                                                                                               | Follow-up to screen and training or assistance with follow-up                                                                                                                                                             | Impact on visit                                                                                                                                                                                             | Impact on referrals and utilization                                                                                                        |
|----------------------------------------------|---------------------------------------------------------------------------------------------|-------------------------------------------------------------------------------------|----------------------------------------------------------------------------------------------------------------------------------------------------------------------------------|---------------------------------------------------------------------------------------------------------------------------------------------------------------------------------------------------------------------------|-------------------------------------------------------------------------------------------------------------------------------------------------------------------------------------------------------------|--------------------------------------------------------------------------------------------------------------------------------------------|
| Williams 2011 <sup>69</sup>                  | 399 youth 4–18 coming to ED                                                                 | DPS                                                                                 | Computer scored                                                                                                                                                                  | ED physicians not involved unless “urgent mental health concern” detected; in that case facilitated a referral. On-site SW.                                                                                               | 97+% of nurse and physician providers not bothered by screening                                                                                                                                             | Not applicable                                                                                                                             |
| Wintersteen 2010 <sup>46</sup>               | 1,415 youth 12–18 in 3 urban primary care clinics                                           | Two stage screen with total 8 questions                                             | Not formally scored; questions asked as part of PCP’s interview of patient                                                                                                       | 90-minute training on youth suicide, including epidemiology, risk and protective factors, assessment, management. SW in clinic to make referrals.                                                                         | Increased three-fold rate of inquiry about SI; increased rate of identifying SI                                                                                                                             | Increased rate of referral to MH                                                                                                           |
| Zuckerbrot 2006 <sup>8</sup>                 | 734 youth 13–17 at health maintenance visit or sick visit at suburban primary care practice | Columbia Depression Scale and depression module of DISC-IV as optional second stage | DISC is computer scored; Providers scored CDS. Providers taught how to use instruments and cut-offs; training included discussion of predictive values at various cut-off values | Clinicians “educated” about adolescent and how use score in combination of assessment of positive symptoms; had option to use clinical interview or DISC as second-stage screen; also received list of referral resources | Providers reported low burden to use CDS but DISC harder; interested in continuing use of CDS but mixed opinions of DISC; overall more comfortable assessing depression; CDS helpful for opening discussion | Not applicable.                                                                                                                            |
| Rausch 2012 <sup>47</sup>                    | 636 youth mean age 16.6 seen in three primary care practices                                | Columbia Depression Scale                                                           | Reviewed and scored by provider. Separate scoring sheet indicated cutoffs and had checkbox for suicidality or need for emergency treatment.                                      | Providers and support staff got “brief introduction” to adolescent depression, instrument; consider referral is any current or previous suicidal thoughts, score above cut-off, or other concern.                         | Providers reported higher level of confidence for identifying and managing depression and felt youth had greater comfort level; 37% of providers thought too burdensome for sick visit                      | 12.6% of those screened received referral for mental health service—did not seem to be an increase from pre-screening though not measured. |

Note: Note: CDI = Children’s Depression Inventory; CDS = Columbia Depression Scale; CES-D = Center for Epidemiologic Studies Depression Scale; DISC = Diagnostic Interview Schedule for Children; DPS = Diagnostic Predictive Scales; ED = Emergency Department; MH=Mental Health; PC = Primary Care; PCP = Primary Care Provider; PDA = personal digital assistant; PDA-DSS = personal digital assistant–based decision support system;

1  
2  
3  
4  
5  
6  
7  
8  
9  
10  
11  
12  
13  
14  
15  
16  
17  
18  
19  
20  
21  
22  
23  
24  
25  
26  
27  
28  
29  
30  
31  
32  
33  
34  
35  
36  
37  
38  
39  
40  
41  
42  
43  
44  
45  
46  
47  
48  
49

PSC = Pediatric Symptom Checklist; SDQ = Strengths and Difficulties Questionnaire; STAI = State-Trait Anxiety Inventory.

<sup>a</sup> List of papers in alphabetical order by first author except where a series of papers discussed distinct studies carried out by the same group

<sup>b</sup> Involve similar populations using the same electronic screening system. A paper describing the system but not reporting on a particular study (Julian 2007<sup>70</sup>) describes features related to confidentiality during administration and decision assistance for the primary care provider (suggested preventive services and referrals, real-time monitoring of results by a suicide prevention team) that are not mentioned in the reports of the four studies. In addition, Stevens 2009<sup>81</sup> describes a trial of enhanced telephone follow-up of a subset of youth who screened positive using the system, and Stevens 2010<sup>82</sup> describes readiness to change among a subset who screened positive for substance use. Neither of these papers provides additional details relevant to the focus of the review.

1  
2  
3  
4  
5  
6  
7  
8  
9  
10  
11  
12  
13  
14  
15  
16  
17  
18  
19  
20  
21  
22  
23  
24  
25  
26  
27  
28  
29  
30  
31  
32  
33  
34  
35  
36  
37  
38  
39  
40  
41  
42  
43  
44  
45  
46  
47  
48  
49

Table S2. Aspects of Screening Engagement

| Lead author, year, and citation <sup>a</sup>                                       | Where and by whom screen introduced                               | How is purpose explained                                                                                           | Parent/youth preferences for framing (if studied)                                                                                                                        | Confidentiality procedures for youth         | Confidentiality statements to youth                                                                        | Acceptance rate if available and applicable                                                                                                                                                                   | Accommodation for literacy or language                                    |
|------------------------------------------------------------------------------------|-------------------------------------------------------------------|--------------------------------------------------------------------------------------------------------------------|--------------------------------------------------------------------------------------------------------------------------------------------------------------------------|----------------------------------------------|------------------------------------------------------------------------------------------------------------|---------------------------------------------------------------------------------------------------------------------------------------------------------------------------------------------------------------|---------------------------------------------------------------------------|
| Applegate 2003 <sup>39</sup>                                                       | In waiting room (recruited and consented by RA)                   | Not stated                                                                                                         | No change in parent satisfaction pre-post intervention                                                                                                                   | Parents only                                 | Not applicable                                                                                             | Not applicable                                                                                                                                                                                                | Not stated                                                                |
| Asarnow 2005 <sup>50</sup> ; Asarnow 2009 <sup>76</sup> ; Wells 2012 <sup>77</sup> | Research assistant obtained consent from parent and youth         | “Interested in how youth feeling;” important to talk to provider about difficulties including stress or depression | Not stated                                                                                                                                                               | Self-administered by youth                   | Not stated                                                                                                 | 13% declined screen                                                                                                                                                                                           | Limited to English                                                        |
| Ballard 2012 <sup>63</sup> ; Horowitz 2010 <sup>66</sup>                           | Approached by study staff member in ED but completed in exam room | Not directly stated but included desire to screen for suicidal ideation                                            | Most youth thought it “OK.” Some felt relief. Minority reported stress. Wanted providers to understand them better, identify risk, prevent harm, connect with resources. | Youth administered screen alone in exam room | Youth told that answers would be shared with clinician and parents would be notified if concern for safety | Parents could decide if medical patients would be screened; overall accept rate 60%; reasons for decline included parent not wanting to leave room, too young to be asked about suicide, too ill to be asked. | Excluded developmental delay and non-English speakers                     |
| Berger-Jenkins 2012 <sup>40</sup>                                                  | Given screen by front desk personnel at well visits               | Not directly stated; screener asked a first question about concerns for behavior, mood, or learning                | Not studied                                                                                                                                                              | Parents only                                 | Not applicable                                                                                             | One-third of eligible parents completed at least first surveillance question; reasons for not completing unknown                                                                                              | PSC in English and Spanish                                                |
| Briggs 2012 <sup>58</sup>                                                          | Nursing staff gave screener to parents in exam room               | Letter provided reviewing purpose of screening (details not stated)                                                | Not studied                                                                                                                                                              | Parents only                                 | Not applicable                                                                                             | 64% of eligible children screened at least once (reasons not known)                                                                                                                                           | Screens in English and Spanish, family could ask for help with completion |

1  
2  
3  
4  
5  
6  
7  
8  
9  
10  
11  
12  
13  
14  
15  
16  
17  
18  
19  
20  
21  
22  
23  
24  
25  
26  
27  
28  
29  
30  
31  
32  
33  
34  
35  
36  
37  
38  
39  
40  
41  
42  
43  
44  
45  
46  
47  
48  
49

| Lead author, year, and citation <sup>a</sup> | Where and by whom screen introduced                                                                                                              | How is purpose explained | Parent/youth preferences for framing (if studied)                                                  | Confidentiality procedures for youth             | Confidentiality statements to youth | Acceptance rate if available and applicable                                            | Accommodation for literacy or language                                             |
|----------------------------------------------|--------------------------------------------------------------------------------------------------------------------------------------------------|--------------------------|----------------------------------------------------------------------------------------------------|--------------------------------------------------|-------------------------------------|----------------------------------------------------------------------------------------|------------------------------------------------------------------------------------|
| Chisolm 2008 <sup>52</sup>                   | Adolescents invited by clinic registration or research staff but parents had to provide consent if under 18; completed on tablet in waiting room | Not stated               | Perceived usefulness and trust were positively related to youth satisfaction                       | Youth responds on tablet in waiting area         | Told clinician would see results    | Acceptance rate not stated; 9% did not complete after they had started                 | Not stated, but literacy issues stated as one of the reasons for non-participation |
| Chisolm 2009 <sup>10</sup>                   | Completed screen in waiting room, how approached not stated                                                                                      | Not stated               | Not studied                                                                                        | Youth responds on tablet in waiting area         | Told clinician would see results    | 25% of eligible population screened                                                    | Not stated                                                                         |
| Stevens 2008 <sup>48</sup>                   | Approached by registration or research staff                                                                                                     | Not stated               | Not studied                                                                                        | Youth responds on tablet in waiting area         | Told clinician would see results    | Recruitment rate for registration staff not known; ranged from 60–95% among three RA's | Not stated                                                                         |
| Gardner 2010 <sup>53</sup>                   | Approached by registration or research staff                                                                                                     | Not stated               | Not stated                                                                                         | Youth responds on tablet in waiting area         | Told clinician would see results    | Recruitment rate for registration staff not known; ranged from 60–95% among three RA's | Not stated                                                                         |
| Diamond 2010 <sup>72</sup>                   | Recruited by research staff                                                                                                                      | Not stated               | Sub-sample of adolescent responders thought it helped during appointment and favored use in future | Youth reply on computer – location not specified | Not stated                          | Not applicable                                                                         | Not stated                                                                         |

1  
2  
3  
4  
5  
6  
7  
8  
9  
10  
11  
12  
13  
14  
15  
16  
17  
18  
19  
20  
21  
22  
23  
24  
25  
26  
27  
28  
29  
30  
31  
32  
33  
34  
35  
36  
37  
38  
39  
40  
41  
42  
43  
44  
45  
46  
47  
48  
49

| Lead author, year, and citation <sup>a</sup> | Where and by whom screen introduced                                          | How is purpose explained                                                                                                                                                                              | Parent/youth preferences for framing (if studied)                                                                                                                                                                                                                                        | Confidentiality procedures for youth                                                                                                                                                                               | Confidentiality statements to youth                                         | Acceptance rate if available and applicable                                                                                                                                | Accommodation for literacy or language                                                                                               |
|----------------------------------------------|------------------------------------------------------------------------------|-------------------------------------------------------------------------------------------------------------------------------------------------------------------------------------------------------|------------------------------------------------------------------------------------------------------------------------------------------------------------------------------------------------------------------------------------------------------------------------------------------|--------------------------------------------------------------------------------------------------------------------------------------------------------------------------------------------------------------------|-----------------------------------------------------------------------------|----------------------------------------------------------------------------------------------------------------------------------------------------------------------------|--------------------------------------------------------------------------------------------------------------------------------------|
| Fein 2010 <sup>59</sup>                      | ED nurse or technician asked adolescents after their medical assessment      | Used “tri-fold pamphlet” explaining purpose (details not stated) for recruiting then “slide and audio show” explaining rationale                                                                      | Not studied                                                                                                                                                                                                                                                                              | Family members “encouraged but not forced” to leave room while youth uses computer                                                                                                                                 | Introduction explains “standard limits of confidentiality”                  | 65% acceptance rate for screening but overall only 33% of eligible screened                                                                                                | Excluded non-English speakers and those with hearing or visual impairment; did offer option of listening to questions via headphones |
| Pailler 2009 <sup>45, 60</sup>               | Presented by ED nurse or technician once patient had initial assessment      | Brochure explained screening initiative and bounds on confidentiality (given to family as placed in exam room); introductory slide show provided rationale for screening and reviewed confidentiality | Parents wanted to be involved and give permission; youth did not want screen to interfere with other concerns; wanted provider to be sensitive and wanted to know about confidentiality; screen earlier to avoid “targeting;” wanted more information about meaning of screening results | Conducted in individual patient rooms; option to listen to introduction on headphones; nurses and technicians requested parents to give youth privacy while completing screen; results not printed to patient room | Adolescents could request confidentiality if not a threat to self or others | About 20% of eligible patients screened; slight decrease after nurses not reminded; apparently related mostly to staff issues; proportion of families accepting not stated | Option to use audio assisted administration                                                                                          |
| Gall 2000 <sup>54</sup>                      | All youth attending school-based health center asked as part of registration | Not stated                                                                                                                                                                                            | Not studied                                                                                                                                                                                                                                                                              | Not stated                                                                                                                                                                                                         | Not stated                                                                  | 95% agreed to complete screen                                                                                                                                              | Not stated                                                                                                                           |

1  
2  
3  
4  
5  
6  
7  
8  
9  
10  
11  
12  
13  
14  
15  
16  
17  
18  
19  
20  
21  
22  
23  
24  
25  
26  
27  
28  
29  
30  
31  
32  
33  
34  
35  
36  
37  
38  
39  
40  
41  
42  
43  
44  
45  
46  
47  
48  
49

| Lead author, year, and citation <sup>a</sup> | Where and by whom screen introduced                                                             | How is purpose explained                                                                       | Parent/youth preferences for framing (if studied)                                                  | Confidentiality procedures for youth               | Confidentiality statements to youth | Acceptance rate if available and applicable                                                                                                                   | Accommodation for literacy or language                                                        |
|----------------------------------------------|-------------------------------------------------------------------------------------------------|------------------------------------------------------------------------------------------------|----------------------------------------------------------------------------------------------------|----------------------------------------------------|-------------------------------------|---------------------------------------------------------------------------------------------------------------------------------------------------------------|-----------------------------------------------------------------------------------------------|
| Garrison 1992 <sup>65</sup>                  | Given to all parents at well-child visits; not stated by whom                                   | Not stated, but parents are asked if they are willing to discuss the results with pediatrician | Not studied                                                                                        | Parent only                                        | Not applicable                      | Proportion screened fell over time from 95% to 60% (attributed to repeat screening); of those stating concerns, 37% did not wish to discuss with pediatrician | Screen provided in English and Spanish                                                        |
| Gruttadero 2011 <sup>38</sup>                | Not applicable                                                                                  | Not applicable                                                                                 | Parents feel that asking about MH at well visits helps normalize these concerns and create comfort | Not applicable                                     | Not applicable                      | Note applicable                                                                                                                                               | Not applicable                                                                                |
| Hacker 2006 <sup>11</sup>                    | Parents and youth completed screen in waiting room, given by registration staff at annual visit | Not stated                                                                                     | In pilot phase parents welcomed use of tool                                                        | Youth completed their own screener in waiting area | Not stated                          | No refusals in pilot phase; 85% of eligible screened in implementation phase; missing forms and literacy issues                                               | Screening instrument in 6 languages; 4% of screens invalid because of excessive missing items |
| Hacker 2009 <sup>12</sup>                    | Parents and youth completed screen in waiting room, given by registration staff at annual visit | Not stated                                                                                     | Not studied                                                                                        | Youth completed their own screener in waiting area | Not stated                          | 70% of eligible had initial screening; not provided, literacy, language, lost form issues                                                                     | Screening instrument in 6 languages                                                           |

1  
2  
3  
4  
5  
6  
7  
8  
9  
10  
11  
12  
13  
14  
15  
16  
17  
18  
19  
20  
21  
22  
23  
24  
25  
26  
27  
28  
29  
30  
31  
32  
33  
34  
35  
36  
37  
38  
39  
40  
41  
42  
43  
44  
45  
46  
47  
48  
49

| Lead author, year, and citation <sup>a</sup> | Where and by whom screen introduced                                                                                                                | How is purpose explained                                                                                                                                                                           | Parent/youth preferences for framing (if studied)                                                                                      | Confidentiality procedures for youth | Confidentiality statements to youth | Acceptance rate if available and applicable                                                                           | Accommodation for literacy or language |
|----------------------------------------------|----------------------------------------------------------------------------------------------------------------------------------------------------|----------------------------------------------------------------------------------------------------------------------------------------------------------------------------------------------------|----------------------------------------------------------------------------------------------------------------------------------------|--------------------------------------|-------------------------------------|-----------------------------------------------------------------------------------------------------------------------|----------------------------------------|
| Hartung 2010 <sup>55</sup>                   | Given to all parents at well visits by receptionist or on indicated basis if parent or provider had MH concern. Completed in waiting or exam room. | Not stated                                                                                                                                                                                         | Not studied                                                                                                                            | Parent only                          | Not applicable                      | Not stated                                                                                                            | Not stated; reading level grade 8.8    |
| Hayutin 2009 <sup>51</sup>                   | Parents approached in waiting room by research assistant                                                                                           | “Study investigating strategies for improving attention to psychosocial issues...” Parents also given information about interpreting scores and told they could raise concerns regardless of score | Not studied                                                                                                                            | Parent only                          | Not applicable                      | 80% agreed to be in study                                                                                             | Not described                          |
| Horwitz 2008 <sup>57</sup>                   | Introductory letter and reminded by phone before visit; online screen completed at home                                                            | Not stated                                                                                                                                                                                         | 53% thought that answering the questions would be of some help in discussing concerns; 85% somewhat likely to use screen a second time | Parent only                          | Not applicable                      | Overall 11% completion rate (range among three sites 9–19%); most did not remember letter, too busy, technical issues | Not stated                             |



1  
2  
3  
4  
5  
6  
7  
8  
9  
10  
11  
12  
13  
14  
15  
16  
17  
18  
19  
20  
21  
22  
23  
24  
25  
26  
27  
28  
29  
30  
31  
32  
33  
34  
35  
36  
37  
38  
39  
40  
41  
42  
43  
44  
45  
46  
47  
48  
49

| Lead author, year, and citation <sup>a</sup>               | Where and by whom screen introduced                                                                                                            | How is purpose explained                        | Parent/youth preferences for framing (if studied) | Confidentiality procedures for youth                                                                                                | Confidentiality statements to youth                                                         | Acceptance rate if available and applicable                                                                                                  | Accommodation for literacy or language |
|------------------------------------------------------------|------------------------------------------------------------------------------------------------------------------------------------------------|-------------------------------------------------|---------------------------------------------------|-------------------------------------------------------------------------------------------------------------------------------------|---------------------------------------------------------------------------------------------|----------------------------------------------------------------------------------------------------------------------------------------------|----------------------------------------|
| Husky 2011 <sup>56</sup>                                   | Parents offered screening when call for appointment; told it is optional but no cost, asked to come early if interested; nurse obtains consent | Not stated                                      |                                                   | Youth completes computerized screen alone in exam room; results reviewed privately with adolescent but informs parent if MH concern | Confidential except if danger to self or others, abuse, "significant functional impairment" | 45% completed screening, with proportion accepting varying over time.                                                                        | Not stated                             |
| 21. Jee 2011 <sup>41</sup>                                 | Nurse gave form to youth in exam room while waiting for provider (also to foster parent if present)                                            | Not stated                                      | Not studied                                       | Youth may or may not be alone in exam room                                                                                          | Not stated                                                                                  | 92% of eligible completed screen                                                                                                             | Limited to English speakers            |
| Jellinek 1999 <sup>78</sup> ; Wasserman 1999 <sup>79</sup> | Parents approached in waiting areas by clinical personnel                                                                                      | Written consent obtained but framing not stated | Not studied                                       | Parent only                                                                                                                         | Not applicable                                                                              | 97% of forms received for processing complete; rate somewhat higher in middle and higher SES versus lower; overall acceptance rate not known | No exclusion criteria described.       |
| Kelleher 1997 <sup>80</sup>                                | Parents enrolled by clinician                                                                                                                  | Written consent obtained but framing not stated | Not studied                                       | Parents only                                                                                                                        | Not applicable                                                                              | >82% of eligible children participated                                                                                                       | No exclusion criteria described        |

1  
2  
3  
4  
5  
6  
7  
8  
9  
10  
11  
12  
13  
14  
15  
16  
17  
18  
19  
20  
21  
22  
23  
24  
25  
26  
27  
28  
29  
30  
31  
32  
33  
34  
35  
36  
37  
38  
39  
40  
41  
42  
43  
44  
45  
46  
47  
48  
49

| Lead author, year, and citation <sup>a</sup> | Where and by whom screen introduced                                                                       | How is purpose explained | Parent/youth preferences for framing (if studied) | Confidentiality procedures for youth | Confidentiality statements to youth                                         | Acceptance rate if available and applicable                                                                                                                                                                            | Accommodation for literacy or language                                    |
|----------------------------------------------|-----------------------------------------------------------------------------------------------------------|--------------------------|---------------------------------------------------|--------------------------------------|-----------------------------------------------------------------------------|------------------------------------------------------------------------------------------------------------------------------------------------------------------------------------------------------------------------|---------------------------------------------------------------------------|
| John 2007 <sup>61</sup>                      | Nursing students could use the screen in an ambulatory clinical placement; approached child or adolescent | Not stated               | Not studied                                       | Not stated                           | Not stated                                                                  | One-third of eligible encounters screened; most barriers seemed to be related to nursing student concerns about appropriateness of screening in ED, specialty, or private practice setting and concern about follow-up | Not stated (but most of those screened were Hispanic or African-American) |
| King 2009 <sup>67</sup>                      | Research assistants obtained consent from parent                                                          | Not stated               | Not studied                                       | Youth completed screen alone         | Parent and clinician would be notified if screen at "high risk"             | 61% agreed to participate                                                                                                                                                                                              | Excluded non English speakers                                             |
| King 20012 <sup>68</sup>                     | Research assistants obtained consent from parent                                                          | Not stated               | Not studied                                       | Youth completed screen alone         | Some youth told their results would be reviewed with them by a staff member | Lower income youth less likely to report depression regardless of review status; lower income less likely to report suicidality if told results would be reviewed                                                      | Reading level varied from 0.2 to 6.1                                      |
| Kuhlthau 2011 <sup>9</sup>                   | Not applicable (paper based on Medicaid claims for screening)                                             | Not applicable           | Not studied                                       | Not known                            | Not known                                                                   | Making screening mandatory for Medicaid-enrolled children increased proportion of visits with screens to 54%                                                                                                           | Not known                                                                 |

1  
2  
3  
4  
5  
6  
7  
8  
9  
10  
11  
12  
13  
14  
15  
16  
17  
18  
19  
20  
21  
22  
23  
24  
25  
26  
27  
28  
29  
30  
31  
32  
33  
34  
35  
36  
37  
38  
39  
40  
41  
42  
43  
44  
45  
46  
47  
48  
49

| Lead author, year, and citation <sup>a</sup> | Where and by whom screen introduced                                                                                                              | How is purpose explained                                                                        | Parent/youth preferences for framing (if studied) | Confidentiality procedures for youth                                              | Confidentiality statements to youth | Acceptance rate if available and applicable                                                                                                                                             | Accommodation for literacy or language                                                                                                             |
|----------------------------------------------|--------------------------------------------------------------------------------------------------------------------------------------------------|-------------------------------------------------------------------------------------------------|---------------------------------------------------|-----------------------------------------------------------------------------------|-------------------------------------|-----------------------------------------------------------------------------------------------------------------------------------------------------------------------------------------|----------------------------------------------------------------------------------------------------------------------------------------------------|
| Metz 1976 <sup>62</sup>                      | Screening takes place as part of hour-long “multiphasic health examination” that is separate from subsequent well visit                          | Not stated                                                                                      | Not studied                                       | Children interviewed alone by an aide without parent if child willing to separate | Not stated                          | Parents of about half of children identified as “new cases” accepted MH follow-up interview; but three-quarters of parents asking for interview were of children classified as low risk | Not known; tests and scales administered by trained paraprofessionals                                                                              |
| Murphy 1996 <sup>42</sup>                    | Parent asked to fill out screener in waiting room; not stated where screening conducted once items were read aloud to parents and record answers | Described as voluntary                                                                          | Not studied                                       | Parent only                                                                       | Not applicable                      | Based on logs screens administered to 1/3 to 1/2 of eligible parents; 90% of those approached agreed<br><br>More positive screens when read aloud versus written administration         | English and Spanish forms available; during study noted that parents had difficulty with forms so changed to have RA read the forms to all parents |
| Pagano 1996 <sup>71</sup>                    | Parent asked to fill out screener in waiting room; not stated where screening conducted once items were read aloud to parents and record answers | Form explained reason for the psychosocial screening study (exact contents not stated in paper) | Not stated                                        | Parent only                                                                       | Parent only                         | Acceptance rate not known<br><br>No difference in positive rate by method of administration (paper vs. oral)                                                                            | English and Spanish forms available; during study noted that parents had difficulty with forms so changed to have RA read the forms to all parents |

1  
2  
3  
4  
5  
6  
7  
8  
9  
10  
11  
12  
13  
14  
15  
16  
17  
18  
19  
20  
21  
22  
23  
24  
25  
26  
27  
28  
29  
30  
31  
32  
33  
34  
35  
36  
37  
38  
39  
40  
41  
42  
43  
44  
45  
46  
47  
48  
49

| Lead author, year, and citation <sup>a</sup> | Where and by whom screen introduced                    | How is purpose explained                                                                                                                                 | Parent/youth preferences for framing (if studied)                                                                                           | Confidentiality procedures for youth                                                                                                 | Confidentiality statements to youth | Acceptance rate if available and applicable | Accommodation for literacy or language |
|----------------------------------------------|--------------------------------------------------------|----------------------------------------------------------------------------------------------------------------------------------------------------------|---------------------------------------------------------------------------------------------------------------------------------------------|--------------------------------------------------------------------------------------------------------------------------------------|-------------------------------------|---------------------------------------------|----------------------------------------|
| Navon 2001 <sup>34</sup>                     | All patients approached in waiting area by RA          | Clinic including questions about children's emotions and behavior as part of their pediatric visit but voluntary; results would be put in child's record | Not studied                                                                                                                                 | Parent only                                                                                                                          | Not applicable                      | About 90% agreed to have child screened     | Bilingual research assistant           |
| Olson 2005 <sup>43</sup>                     | Not stated; used as routine in participating practices | Not stated                                                                                                                                               | Youth said novelty of PDA was engaging and preferred to "being grilled;" reported being candid and said it made it easier to discuss issues | Youth used PDA with small screen and answers that "disappeared" so confidentiality possible even though administered in waiting area | Not stated                          | Not known                                   | Not stated                             |
| Olson 2009 <sup>44</sup>                     | Given to adolescents during health maintenance visits  | Not stated                                                                                                                                               | Youth said screening resulted in their being listened to more carefully, had fewer unexplored concerns, greater belief in confidentiality   | Youth used PDA in waiting area as in Olson 2005                                                                                      | Not stated                          | Not known                                   | Not stated                             |

1  
2  
3  
4  
5  
6  
7  
8  
9  
10  
11  
12  
13  
14  
15  
16  
17  
18  
19  
20  
21  
22  
23  
24  
25  
26  
27  
28  
29  
30  
31  
32  
33  
34  
35  
36  
37  
38  
39  
40  
41  
42  
43  
44  
45  
46  
47  
48  
49

| Lead author, year, and citation <sup>a</sup> | Where and by whom screen introduced                                 | How is purpose explained                                                                       | Parent/youth preferences for framing (if studied)                                                                                                                               | Confidentiality procedures for youth                             | Confidentiality statements to youth     | Acceptance rate if available and applicable                                                 | Accommodation for literacy or language                                                                                        |
|----------------------------------------------|---------------------------------------------------------------------|------------------------------------------------------------------------------------------------|---------------------------------------------------------------------------------------------------------------------------------------------------------------------------------|------------------------------------------------------------------|-----------------------------------------|---------------------------------------------------------------------------------------------|-------------------------------------------------------------------------------------------------------------------------------|
| Schubiner 1994 <sup>49</sup>                 | Completed prior to visit                                            | Part of study where purpose stated as learning how adolescents are interviewed                 | Study compared structured interview with review of the screener: review led to shorter visit and led to more accurate detection of MH problems                                  | Completed in waiting room                                        | Not stated                              | Not stated (screening part of randomized trial)                                             | Not stated                                                                                                                    |
| Smith 1990 <sup>54</sup>                     | Consecutive adolescent clinic patients                              | “Mood questionnaire given to all new patients”                                                 | Not studied                                                                                                                                                                     | Not stated                                                       | Not stated                              | 90% of eligible participated; mostly excluded by language                                   | Excluded non-English speakers                                                                                                 |
| Williams 2011 <sup>69</sup>                  | RA’s approached families and obtained consent                       | Short orientation to computer program; framing not stated                                      | Most parents and children thought screening acceptable but only 61% thought it helpful; minority parents and those whose children had MH problem more likely to find it helpful | Headphones and audio-assisted administration for confidentiality | Not stated                              | Not stated                                                                                  | Excluded non-English speakers                                                                                                 |
| Wintersteen 2010 <sup>46</sup>               | Suicide questions built into EMR psychosocial template              | Framed by other questions in psychosocial template                                             | Not studied                                                                                                                                                                     | Not stated (part of primary care visit)                          | Not stated (part of primary care visit) | Adding item to EMR increased rate of inquiry from 37 to 82%                                 | Not applicable                                                                                                                |
| Zuckerbrot 2006 <sup>8</sup>                 | Front desk staff offered initial paper screen to all eligible youth | Not stated (but results suggest that front-desk staff could provide information about process) | Not studied                                                                                                                                                                     | Taken to confidential space, sealed screen after completion      | Not stated                              | 53% of eligible completed screens; reason for most missing not known; few recorded refusals | Follow-up assessment found that front-desk staff needed training on how to respond to patient and parent queries and concerns |

1  
2  
3  
4  
5  
6  
7  
8  
9  
10  
11  
12  
13  
14  
15  
16  
17  
18  
19  
20  
21  
22  
23  
24  
25  
26  
27  
28  
29  
30  
31  
32  
33  
34  
35  
36  
37  
38  
39  
40  
41  
42  
43  
44  
45  
46  
47  
48  
49

| Lead author, year, and citation <sup>a</sup> | Where and by whom screen introduced | How is purpose explained | Parent/youth preferences for framing (if studied) | Confidentiality procedures for youth | Confidentiality statements to youth | Acceptance rate if available and applicable                                                | Accommodation for literacy or language |
|----------------------------------------------|-------------------------------------|--------------------------|---------------------------------------------------|--------------------------------------|-------------------------------------|--------------------------------------------------------------------------------------------|----------------------------------------|
| 36. Rausch 2012 <sup>47</sup>                | Given by medical assistant.         | Not stated               | Not studied                                       | Not stated                           | Not stated                          | 92% of those approached agreed but assistants gave screener to only about 25% of eligible. | CDS available in English and Spanish   |

Note: CDS = Columbia Depression Scale; ED = emergency department; EMR = electronic medical record; MH = mental health; PDA = personal digital assistant; PSC = Pediatric Symptom Checklist; RA = research assistant; SES = socioeconomic status.

<sup>a</sup> List of studies in alphabetical order by first author except where a series of papers discussed distinct studies carried out by the same group.

Table S3. PRISMA Checklist for Systematic Review

| Topic title                   | Item | Page                                        |
|-------------------------------|------|---------------------------------------------|
| Title                         | 1    |                                             |
| <b>Abstract</b>               |      |                                             |
| Structured summary            | 2    |                                             |
| <b>Introduction</b>           |      |                                             |
| Rationale                     | 3    |                                             |
| Objectives                    | 4    |                                             |
| <b>Method</b>                 |      |                                             |
| Protocol                      | 5    |                                             |
| Eligibility                   | 6    |                                             |
| Information sources           | 7    |                                             |
| Search                        | 8    | Supplement 1, available online              |
| Study selection               | 9    |                                             |
| Extraction process            | 10   |                                             |
| Data items                    | 11   | Tables S1 and S2 columns, available online. |
| Bias in individual studies    | 12   | Not assessed                                |
| Summary measures              | 13   | Not applicable—narrative review             |
| Synthesis of results          | 14   | Narrative synthesis                         |
| Risk of bias across studies   | 15   |                                             |
| Additional analyses           | 16   | Not applicable                              |
| <b>Results</b>                |      |                                             |
| Study selection               | 17   |                                             |
| Study characteristics         | 18   | Xxx, supplemental tables, available online  |
| Risk of bias within studies   | 19   |                                             |
| Results of individual studies | 20   | Tables S1 and S2, available online          |
| Synthesis of results          | 21   |                                             |
| Risk of bias across studies   | 22   |                                             |
| Additional analyses           | 23   |                                             |
| <b>Discussion</b>             |      |                                             |

1  
2  
3  
4  
5  
6  
7  
8  
9  
10  
11  
12  
13  
14  
15  
16  
17  
18  
19  
20  
21  
22  
23  
24  
25  
26  
27  
28  
29  
30  
31  
32  
33  
34  
35  
36  
37  
38  
39  
40  
41  
42  
43  
44  
45  
46  
47  
48  
49  
50  
51  
52  
53  
54  
55  
56  
57  
58  
59  
60  
61  
62  
63  
64  
65

|                     |    |  |
|---------------------|----|--|
| Summary of evidence | 24 |  |
| Limitations         | 25 |  |
| Conclusions         | 26 |  |
| Funding             | 27 |  |
